# Supplementary material
Source: PubMed Central journal article supplement (PMC5451230)
Supplement: jci-127-90281-s001.pdf [file jci-127-90281-s001.pdf]

## Supplemental Figures and Figure Legends

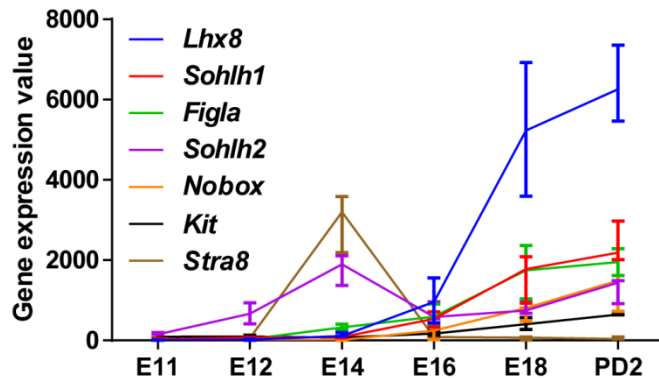

**Supplemental Figure 1. Germ cell-specific gene expression profile during embryonic ovarian development.** Gene expression values were derived from the GDS2203 GEO data set. The GDS2203 data set consists of RNA expression data derived from three independent experiments at each time point on the Affymetrix Mouse Genome 430 platform at various stages of development, commencing at Embryonic Day 11 (E11) and ending at Postnatal Day 2 (PD2). *Lhx8* (blue), *Sohlh1* (red), *Figla* (green), *Sohlh2* (purple), *Nobox* (orange), *Kit* (gray), and *Stra8* (brown) expressions are plotted against E11-PD2 time points. Note that expression of *Lhx8*, *Kit*, *Sohlh1*, *Figla*, and *Nobox* rise in parallel and commence circa embryonic day 16 (E16).

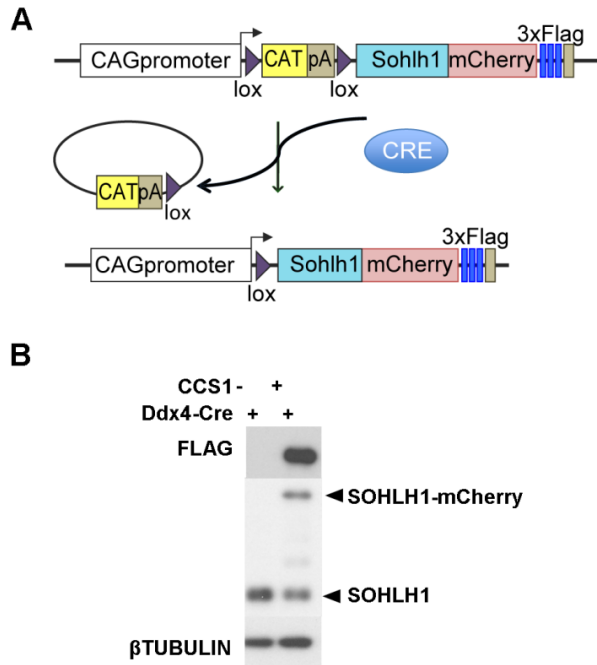

**Supplemental Figure 2. CAG-loxp-CAT-loxp Sohlh1-mCherry (CCS1) transgene.** (A) Diagram of the *CCS1* transgene shows chicken beta actin hybrid promoter (CAG), a floxed chloramphenicol acetyltransferase gene that prevents *Sohlh1* expression in the absence of *Cre*, mCherry, and FLAG tag. (B) *CCS1* in the presence of *Ddx4-Cre* expresses SOHLH1-mCherry protein as shown by Western immunoblotting with anti-FLAG and anti-SOHLH1 antibodies ( $n = 3$  per group). Data are representative of at least 3 independent experiments.

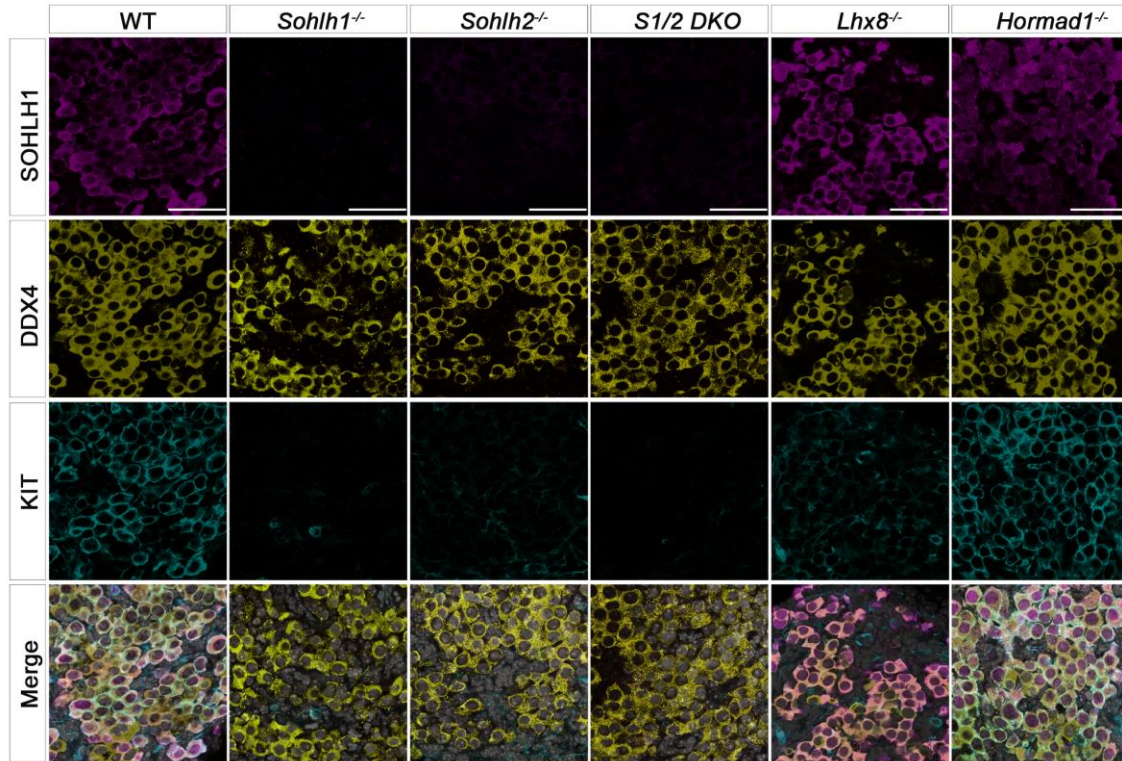

**Supplemental Figure 3. KIT expression is disrupted by *Sohlh1*, *Sohlh2*, and *Lhx8* deficiencies.** Immunofluorescence staining with SOHLH1 (magenta), DDX4 (yellow), and KIT (cyan) in ovaries derived from wild type, *Sohlh1*<sup>-/-</sup>, *Sohlh2*<sup>-/-</sup>, double knockout (*S1/2DKO*), *Lhx8*<sup>-/-</sup>, and *Hormad1*<sup>-/-</sup> mice. *Hormad1*<sup>-/-</sup> did not affect KIT or DDX4 expression ( $n = 3$  per group). DNA was stained with DAPI (gray). Data are representative of at least 3 independent experiments. Scale bar = 50  $\mu$ m.

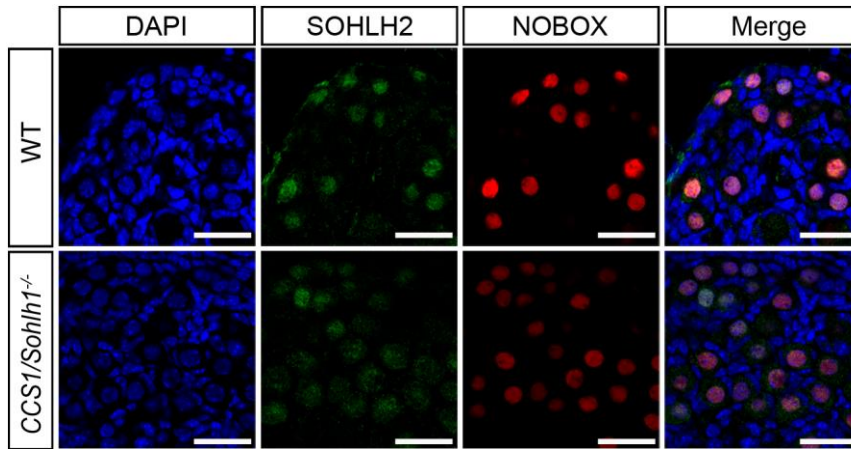

**Supplemental Figure 4. The expression of SOHLH2 and NOBOX in wild-type and *CCS1/Sohlh1<sup>-/-</sup>/Ddx4Cre* ovaries at PD3.** NOBOX only expresses in the oocyte nucleus. In wild-type ovaries, SOHLH2 preferentially expresses in the oocyte nucleus, whereas both in the oocyte nucleus and cytoplasm in *CCS1/Sohlh1<sup>-/-</sup>/Ddx4Cre* ovaries. Scale bars: 30  $\mu$ m.

| Name     | Chromosome | WT RPKM | S1KO RPKM | S2KO RPKM | S1/2 DKO RPKM | S1KO/W T | S2KO/W T | S1/2DKOW T |
|----------|------------|---------|-----------|-----------|---------------|----------|----------|------------|
| AU015836 | X          | 16.40   | 2.69      | 3.83      | 2.46          | 0.16     | 0.23     | 0.15       |
| Kif14    | 1          | 12.65   | 2.80      | 2.84      | 2.36          | 0.22     | 0.22     | 0.19       |
| Mvp      | 7          | 9.79    | 2.17      | 2.20      | 1.60          | 0.22     | 0.22     | 0.16       |
| Rab3d    | 9          | 8.04    | 1.87      | 1.78      | 1.48          | 0.23     | 0.22     | 0.18       |
| Lsm14b   | 2          | 39.37   | 7.56      | 8.65      | 7.80          | 0.19     | 0.22     | 0.20       |
| Ctse     | 1          | 9.79    | 0.67      | 2.02      | 0.14          | 0.07     | 0.21     | 0.01       |
| Bfsp1    | 2          | 8.55    | 1.70      | 1.75      | 1.66          | 0.20     | 0.20     | 0.19       |
| Tnfrsf14 | 4          | 6.77    | 0.96      | 1.38      | 0.06          | 0.14     | 0.20     | 0.01       |
| Cdc25b   | 2          | 7.36    | 1.32      | 1.47      | 0.85          | 0.18     | 0.20     | 0.12       |
| Ppp1r15a | 7          | 14.07   | 2.47      | 2.77      | 2.48          | 0.18     | 0.20     | 0.18       |
| Tle6     | 10         | 13.23   | 2.24      | 2.55      | 2.63          | 0.17     | 0.19     | 0.20       |
| Ctsg     | 14         | 8.21    | 1.45      | 1.57      | 0.53          | 0.18     | 0.19     | 0.06       |
| Padi6    | 4          | 26.97   | 3.15      | 5.11      | 4.43          | 0.12     | 0.19     | 0.16       |
| Spta1    | 1          | 10.31   | 0.92      | 1.91      | 0.04          | 0.09     | 0.19     | 0.00       |
| Trim71   | 9          | 9.66    | 1.31      | 1.78      | 1.47          | 0.14     | 0.18     | 0.15       |
| Rhd      | 4          | 7.06    | 0.88      | 1.29      | 0.30          | 0.12     | 0.18     | 0.04       |
| Sycp2l   | 13         | 6.40    | 0.91      | 1.16      | 1.00          | 0.14     | 0.18     | 0.16       |
| Ermap    | 4          | 12.81   | 1.06      | 2.31      | 0.05          | 0.08     | 0.18     | 0.00       |
| Elane    | 10         | 7.96    | 1.70      | 1.43      | 0.76          | 0.21     | 0.18     | 0.10       |
| Cpox     | 16         | 19.27   | 2.15      | 3.46      | 1.61          | 0.11     | 0.18     | 0.08       |
| Hmga1    | 17         | 21.11   | 3.20      | 3.66      | 2.72          | 0.15     | 0.17     | 0.13       |
| Nlrp5    | 7          | 52.62   | 9.40      | 9.09      | 8.20          | 0.18     | 0.17     | 0.16       |
| Klf1     | 8          | 7.20    | 0.68      | 1.19      | 0.04          | 0.09     | 0.17     | 0.01       |
| Fam46c   | 3          | 11.58   | 2.25      | 1.82      | 1.47          | 0.19     | 0.16     | 0.13       |
| Esrp1    | 4          | 11.39   | 1.86      | 1.67      | 2.12          | 0.16     | 0.15     | 0.19       |
| Hemgn    | 4          | 13.36   | 0.76      | 1.85      | 0.02          | 0.06     | 0.14     | 0.00       |
| Slc25a37 | 14         | 14.82   | 1.56      | 1.98      | 1.13          | 0.11     | 0.13     | 0.08       |
| Mpo      | 11         | 19.06   | 2.66      | 2.47      | 0.94          | 0.14     | 0.13     | 0.05       |
| Hbb-bs   | 7          | 450.84  | 103.45    | 53.64     | 32.64         | 0.23     | 0.12     | 0.07       |
| Gypa     | 8          | 25.02   | 1.60      | 2.97      | 0.12          | 0.06     | 0.12     | 0.00       |
| Lonrf3   | X          | 15.76   | 2.39      | 1.74      | 2.18          | 0.15     | 0.11     | 0.14       |
| Tcl1     | 12         | 8.16    | 0.53      | 0.87      | 1.00          | 0.06     | 0.11     | 0.12       |
| Olfm4    | 14         | 15.40   | 2.82      | 1.48      | 0.42          | 0.18     | 0.10     | 0.03       |
| Sptb     | 12         | 9.94    | 0.59      | 0.87      | 0.28          | 0.06     | 0.09     | 0.03       |
| Alas2    | X          | 48.36   | 9.40      | 4.06      | 1.90          | 0.19     | 0.08     | 0.04       |
| Uchl1    | 5          | 43.54   | 3.24      | 3.61      | 3.33          | 0.07     | 0.08     | 0.08       |
| Kit      | 5          | 40.69   | 2.83      | 2.97      | 2.01          | 0.07     | 0.07     | 0.05       |
| Sohlh1   | 2          | 10.71   | 0.28      | 0.66      | 0.24          | 0.03     | 0.06     | 0.02       |
| Lhx8     | 3          | 13.63   | 0.46      | 0.63      | 0.70          | 0.03     | 0.05     | 0.05       |
| Slc4a1   | 11         | 36.82   | 1.29      | 1.54      | 0.05          | 0.03     | 0.04     | 0.00       |
| Zp3      | 5          | 8.92    | 0.24      | 0.37      | 0.37          | 0.03     | 0.04     | 0.04       |

|      |    |       |      |      |      |      |      |      |
|------|----|-------|------|------|------|------|------|------|
| Ccno | 13 | 14.51 | 0.13 | 0.29 | 0.20 | 0.01 | 0.02 | 0.01 |
|------|----|-------|------|------|------|------|------|------|

**Supplemental Table 1. Genes commonly downregulated in mutants ( $\geq 2$ -fold,  $q < 0.05$  against wild type).**

| Name          | Chromosome | WT RPKM | S1KO RPKM | S2KO RPKM | S1/2 DKO RPKM | S1KO/WT | S2KO/WT | S1/2DKO/WT |
|---------------|------------|---------|-----------|-----------|---------------|---------|---------|------------|
| Stfa2l1       | 16         | 30.83   | 13.29     | 13.71     | 1.86          | 0.43    | 0.44    | 0.06       |
| Hmbs          | 9          | 13.11   | 4.21      | 5.28      | 2.95          | 0.32    | 0.40    | 0.23       |
| BC100530      | 16         | 25.11   | 9.00      | 9.77      | 1.95          | 0.36    | 0.39    | 0.08       |
| H2afx         | 9          | 23.87   | 9.37      | 9.04      | 5.19          | 0.39    | 0.38    | 0.22       |
| Camp          | 9          | 38.78   | 16.93     | 14.34     | 1.87          | 0.44    | 0.37    | 0.05       |
| Gm5483        | 16         | 26.73   | 11.81     | 9.66      | 2.44          | 0.44    | 0.36    | 0.09       |
| Tuba1c        | 15         | 16.64   | 5.76      | 5.91      | 4.09          | 0.35    | 0.36    | 0.25       |
| Cd24a         | 10         | 133.33  | 36.09     | 47.35     | 27.91         | 0.27    | 0.36    | 0.21       |
| Map3k11       | 19         | 4.65    | 1.63      | 1.65      | 1.16          | 0.35    | 0.35    | 0.25       |
| S100a9        | 3          | 273.48  | 104.53    | 95.20     | 23.48         | 0.38    | 0.35    | 0.09       |
| Cd47          | 16         | 7.94    | 2.23      | 2.69      | 1.87          | 0.28    | 0.34    | 0.23       |
| Glx5          | 12         | 12.43   | 3.26      | 4.16      | 2.39          | 0.26    | 0.33    | 0.19       |
| E2f4          | 8          | 10.63   | 3.65      | 3.52      | 2.51          | 0.34    | 0.33    | 0.24       |
| Hist2h4       | 3          | 5.05    | 2.31      | 1.65      | 0.96          | 0.46    | 0.33    | 0.19       |
| Lyz2          | 10         | 21.91   | 9.07      | 6.91      | 4.18          | 0.41    | 0.32    | 0.19       |
| S100a8        | 3          | 99.27   | 32.17     | 30.01     | 7.96          | 0.32    | 0.30    | 0.08       |
| Stfa2         | 16         | 17.44   | 6.00      | 5.25      | 1.09          | 0.34    | 0.30    | 0.06       |
| Myb           | 10         | 6.74    | 2.12      | 1.98      | 0.33          | 0.32    | 0.29    | 0.05       |
| Cdr2          | 7          | 7.07    | 2.03      | 2.03      | 1.45          | 0.29    | 0.29    | 0.21       |
| Al662270      | 11         | 6.96    | 1.84      | 1.92      | 0.31          | 0.26    | 0.28    | 0.04       |
| Ngp           | 9          | 57.11   | 19.40     | 15.72     | 2.12          | 0.34    | 0.28    | 0.04       |
| Chil3         | 3          | 6.50    | 1.69      | 1.68      | 0.09          | 0.26    | 0.26    | 0.01       |
| Lcn2          | 2          | 6.40    | 1.93      | 1.64      | 0.23          | 0.30    | 0.26    | 0.04       |
| Stfa3         | 16         | 36.21   | 12.97     | 9.08      | 1.17          | 0.36    | 0.25    | 0.03       |
| Hist2h3c2     | 3          | 12.86   | 7.01      | 9.03      | 3.17          | 0.55    | 0.70    | 0.25       |
| F630028O10Rik | X          | 5.64    | 3.31      | 2.91      | 0.61          | 0.59    | 0.52    | 0.11       |
| Hist1h4m      | 13         | 17.20   | 10.31     | 6.42      | 1.09          | 0.60    | 0.37    | 0.06       |
| Hist2h2ac     | 3          | 122.18  | 78.72     | 31.56     | 25.56         | 0.64    | 0.26    | 0.21       |
| Hist1h2ag     | 13         | 57.30   | 37.67     | 24.63     | 11.41         | 0.66    | 0.43    | 0.20       |
| Stfa1         | 16         | 19.55   | 20.26     | 16.91     | 1.73          | 1.04    | 0.87    | 0.09       |

**Supplemental Table 2. Genes significantly downregulated in Sohlh1/2 DKO ( $\geq 2$ -fold,  $q < 0.05$  against wild type).**

| Name          | Chromosome | WT RPKM | S1KO RPKM | S2KO RPKM | S1/2 DKO RPKM | S1KO/WT | S2KO/WT | S1/2DKO/WT |
|---------------|------------|---------|-----------|-----------|---------------|---------|---------|------------|
| Gpm6a         | 8          | 2.63    | 5.61      | 6.50      | 5.29          | 2.13    | 2.47    | 2.01       |
| Ptn           | 6          | 5.69    | 16.51     | 16.74     | 11.65         | 2.90    | 2.94    | 2.05       |
| Gm10471       | 5          | 4.85    | 12.47     | 10.13     | 10.01         | 2.57    | 2.09    | 2.06       |
| Tktl1         | X          | 9.34    | 20.55     | 20.54     | 20.54         | 2.20    | 2.20    | 2.20       |
| 1700018B24Rik | 3          | 1.52    | 4.09      | 3.92      | 3.41          | 2.69    | 2.58    | 2.24       |
| Hist1h2aa     | 13         | 9.11    | 21.77     | 24.74     | 20.45         | 2.39    | 2.72    | 2.24       |
| D1Pas1        | 1          | 1.17    | 2.97      | 3.21      | 2.69          | 2.55    | 2.76    | 2.31       |
| Hddc3         | 7          | 1.40    | 2.92      | 3.30      | 3.32          | 2.09    | 2.36    | 2.38       |
| Cst12         | 2          | 3.46    | 6.98      | 7.76      | 8.28          | 2.02    | 2.24    | 2.39       |
| 5031410I06Rik | 5          | 15.38   | 47.80     | 44.34     | 36.93         | 3.11    | 2.88    | 2.40       |
| Syce3         | 15         | 1.04    | 2.99      | 2.89      | 2.54          | 2.88    | 2.79    | 2.45       |
| Xlr           | X          | 1.31    | 2.98      | 3.53      | 3.31          | 2.27    | 2.69    | 2.52       |
| Rpl26         | 11         | 118.52  | 305.87    | 284.58    | 299.06        | 2.58    | 2.40    | 2.52       |
| Acyp2         | 11         | 1.65    | 3.38      | 3.98      | 4.28          | 2.06    | 2.41    | 2.60       |
| Ugt8a         | 3          | 1.17    | 2.88      | 2.92      | 3.09          | 2.46    | 2.51    | 2.65       |
| Taf9b         | X          | 2.89    | 6.45      | 6.90      | 7.77          | 2.23    | 2.39    | 2.69       |
| Sap25         | 5          | 0.14    | 0.88      | 0.48      | 0.38          | 6.39    | 3.51    | 2.76       |
| Usp26         | X          | 1.05    | 2.85      | 2.82      | 2.96          | 2.71    | 2.68    | 2.81       |
| Taf7l         | X          | 19.12   | 39.83     | 46.57     | 54.75         | 2.08    | 2.44    | 2.86       |
| Topaz1        | 9          | 1.70    | 4.84      | 4.26      | 4.88          | 2.85    | 2.51    | 2.87       |
| Sycp2         | 2          | 8.04    | 18.79     | 18.65     | 23.27         | 2.34    | 2.32    | 2.90       |
| Fmr1nb        | X          | 3.09    | 8.38      | 8.87      | 8.98          | 2.71    | 2.87    | 2.90       |
| Gab3          | X          | 1.12    | 3.07      | 3.43      | 3.27          | 2.75    | 3.07    | 2.93       |
| Gm364         | X          | 5.73    | 14.08     | 16.40     | 16.95         | 2.46    | 2.86    | 2.96       |
| Hfm1          | 5          | 2.42    | 5.90      | 5.18      | 7.15          | 2.44    | 2.14    | 2.96       |
| Ccdc152       | 15         | 6.13    | 16.23     | 15.84     | 18.47         | 2.65    | 2.58    | 3.01       |
| Ccnb3         | X          | 3.42    | 10.01     | 7.41      | 10.45         | 2.92    | 2.17    | 3.05       |
| Ccdc173       | 2          | 1.36    | 3.71      | 3.12      | 4.21          | 2.73    | 2.30    | 3.10       |
| 9230104L09Rik | 2          | 0.18    | 0.95      | 0.60      | 0.59          | 5.25    | 3.30    | 3.22       |
| Rhox2a        | X          | 1.13    | 4.10      | 5.23      | 3.67          | 3.62    | 4.61    | 3.24       |
| Nup62cl       | X          | 1.54    | 4.06      | 4.34      | 5.17          | 2.64    | 2.82    | 3.36       |
| Pcna-ps2      | 19         | 3.26    | 11.67     | 12.73     | 10.96         | 3.58    | 3.90    | 3.36       |
| Xlr5a         | X          | 3.20    | 8.39      | 10.21     | 10.82         | 2.62    | 3.19    | 3.38       |
| Hist1h2ba     | 13         | 10.96   | 43.46     | 38.97     | 37.99         | 3.97    | 3.56    | 3.47       |
| Barx1         | 13         | 0.18    | 1.08      | 0.76      | 0.61          | 6.17    | 4.30    | 3.48       |
| Vmn2r13       | 5          | 0.18    | 1.10      | 0.51      | 0.62          | 6.27    | 2.89    | 3.52       |
| Gm1140        | X          | 2.83    | 5.94      | 6.90      | 10.00         | 2.10    | 2.44    | 3.53       |
| Rad51ap2      | 12         | 0.61    | 3.29      | 1.98      | 2.18          | 5.38    | 3.24    | 3.57       |
| Gm11837       | 4          | 1.35    | 3.83      | 3.49      | 4.93          | 2.83    | 2.59    | 3.65       |
| Efhc2         | X          | 0.91    | 2.90      | 2.99      | 3.34          | 3.19    | 3.29    | 3.67       |
| Apoc1         | 7          | 1.73    | 5.65      | 5.67      | 6.38          | 3.27    | 3.28    | 3.69       |
| Xlr5b         | X          | 1.02    | 3.47      | 3.34      | 3.91          | 3.40    | 3.28    | 3.83       |
| AV320801      | X          | 1.16    | 4.41      | 3.44      | 4.59          | 3.81    | 2.96    | 3.95       |
| Pramel3       | X          | 1.37    | 4.98      | 5.48      | 5.46          | 3.62    | 3.98    | 3.97       |



|               |    |      |       |       |       |       |       |      |
|---------------|----|------|-------|-------|-------|-------|-------|------|
| Rdm1          | 11 | 1.04 | 5.00  | 5.41  | 4.14  | 4.81  | 5.19  | 3.98 |
| Tecrl         | 5  | 0.84 | 3.63  | 2.78  | 3.39  | 4.34  | 3.32  | 4.05 |
| Trap1a        | X  | 2.11 | 9.49  | 8.89  | 8.58  | 4.50  | 4.21  | 4.06 |
| Pet2          | X  | 3.54 | 13.29 | 11.75 | 14.90 | 3.75  | 3.32  | 4.21 |
| Tex19.2       | 11 | 0.20 | 1.15  | 0.69  | 0.85  | 5.74  | 3.46  | 4.23 |
| Oacyl         | 18 | 0.21 | 1.15  | 0.84  | 0.89  | 5.59  | 4.09  | 4.32 |
| Gramd1c       | 16 | 0.95 | 3.66  | 3.59  | 4.12  | 3.86  | 3.78  | 4.35 |
| Gm5128        | X  | 2.30 | 9.04  | 9.50  | 10.01 | 3.94  | 4.14  | 4.36 |
| Rhox7a        | X  | 0.27 | 1.40  | 1.24  | 1.20  | 5.25  | 4.64  | 4.49 |
| Tex101        | 7  | 3.73 | 17.49 | 15.10 | 17.65 | 4.68  | 4.05  | 4.73 |
| Hand2         | 8  | 0.23 | 3.58  | 0.84  | 1.11  | 15.39 | 3.63  | 4.78 |
| Tex16         | X  | 1.88 | 8.53  | 7.82  | 9.03  | 4.53  | 4.15  | 4.80 |
| Cpa3          | 3  | 6.56 | 20.46 | 32.74 | 32.38 | 3.12  | 4.99  | 4.94 |
| 3830403N18Rik | X  | 0.53 | 2.86  | 2.27  | 2.73  | 5.34  | 4.25  | 5.10 |
| 1700013H16Rik | X  | 1.47 | 9.56  | 7.61  | 7.57  | 6.49  | 5.16  | 5.14 |
| Myom3         | 4  | 0.13 | 0.69  | 0.59  | 0.68  | 5.23  | 4.53  | 5.18 |
| Mcpt4         | 14 | 1.41 | 4.03  | 9.98  | 7.63  | 2.86  | 7.09  | 5.42 |
| Rhox7-ps      | X  | 0.41 | 3.12  | 2.40  | 2.21  | 7.66  | 5.90  | 5.43 |
| Folr4         | 9  | 0.27 | 1.37  | 1.88  | 1.48  | 5.04  | 6.94  | 5.45 |
| Gm595         | X  | 1.02 | 7.01  | 6.23  | 5.59  | 6.89  | 6.12  | 5.50 |
| Cma1          | 14 | 4.17 | 16.68 | 24.41 | 23.20 | 4.00  | 5.85  | 5.56 |
| Timd4         | 11 | 0.24 | 1.89  | 1.58  | 1.37  | 7.89  | 6.61  | 5.75 |
| Sis           | 3  | 0.74 | 1.62  | 3.64  | 4.41  | 2.19  | 4.90  | 5.94 |
| Tpsb2         | 17 | 1.82 | 11.75 | 13.29 | 10.81 | 6.46  | 7.30  | 5.94 |
| Prss50        | 9  | 0.19 | 2.07  | 2.02  | 1.12  | 11.02 | 10.76 | 5.95 |
| Nlrp4e        | 7  | 0.12 | 0.70  | 0.58  | 0.75  | 5.63  | 4.66  | 6.06 |
| Cers3         | 7  | 0.20 | 1.25  | 1.39  | 1.24  | 6.21  | 6.88  | 6.16 |
| Rhox2g        | X  | 0.10 | 0.68  | 0.81  | 0.63  | 6.63  | 7.87  | 6.16 |
| 4933425L06Rik | 13 | 0.33 | 2.14  | 1.70  | 2.06  | 6.50  | 5.16  | 6.25 |
| Hist1h1t      | 13 | 1.87 | 9.35  | 12.74 | 11.81 | 4.99  | 6.80  | 6.30 |
| 4933403O08Rik | X  | 0.14 | 0.81  | 0.95  | 0.93  | 5.70  | 6.73  | 6.53 |
| Gm1564        | 11 | 1.40 | 10.52 | 6.15  | 9.33  | 7.50  | 4.38  | 6.65 |
| Xlr5c         | X  | 0.89 | 5.43  | 6.03  | 6.03  | 6.12  | 6.80  | 6.80 |
| Scml1         | X  | 0.38 | 2.24  | 2.06  | 2.63  | 5.90  | 5.43  | 6.93 |
| 1700080O16Rik | X  | 0.43 | 2.93  | 3.05  | 3.03  | 6.73  | 7.02  | 6.98 |
| Svopl         | 6  | 0.49 | 3.68  | 4.27  | 3.49  | 7.58  | 8.81  | 7.19 |
| Olf461        | 6  | 0.23 | 1.20  | 1.07  | 1.68  | 5.18  | 4.60  | 7.24 |
| Rhox5         | X  | 0.62 | 3.21  | 5.03  | 4.69  | 5.22  | 8.16  | 7.61 |
| Rhox2c        | X  | 0.10 | 0.49  | 0.83  | 0.73  | 5.18  | 8.73  | 7.64 |
| Cox7b2        | 5  | 0.50 | 3.05  | 2.90  | 3.85  | 6.05  | 5.76  | 7.64 |
| Dpep3         | 8  | 1.02 | 9.02  | 8.52  | 7.89  | 8.81  | 8.32  | 7.71 |
| Rhox2d        | X  | 0.12 | 1.29  | 0.45  | 0.93  | 10.77 | 3.78  | 7.77 |
| SCHIP1        | 3  | 0.13 | 0.92  | 0.82  | 1.03  | 7.23  | 6.44  | 8.11 |
| Rhox6         | X  | 0.35 | 1.93  | 2.25  | 3.05  | 5.48  | 6.39  | 8.66 |
| Rhox7b        | X  | 0.13 | 1.47  | 0.97  | 1.09  | 11.77 | 7.74  | 8.68 |
| Tas2r137      | 6  | 0.22 | 1.15  | 1.42  | 1.91  | 5.28  | 6.49  | 8.74 |
| Stra8         | 6  | 0.06 | 0.74  | 0.54  | 0.54  | 12.22 | 8.97  | 8.84 |

|               |    |      |       |       |       |       |       |       |
|---------------|----|------|-------|-------|-------|-------|-------|-------|
| Rhox2b        | X  | 0.16 | 1.27  | 1.20  | 1.43  | 8.01  | 7.55  | 9.02  |
| Steap1        | 5  | 0.10 | 0.59  | 0.52  | 0.91  | 5.97  | 5.29  | 9.16  |
| Gm4926        | 11 | 0.05 | 0.69  | 0.61  | 0.50  | 13.53 | 11.96 | 9.92  |
| Gml           | 15 | 0.21 | 1.24  | 1.46  | 2.36  | 5.80  | 6.82  | 11.08 |
| Dynlrb2       | 8  | 0.17 | 1.96  | 1.40  | 1.86  | 11.88 | 8.50  | 11.26 |
| Reg2          | 6  | 0.08 | 0.52  | 0.82  | 0.89  | 6.63  | 10.39 | 11.26 |
| Gm773         | X  | 1.70 | 19.55 | 17.04 | 19.94 | 11.53 | 10.05 | 11.76 |
| 4930524B15Rik | 11 | 0.08 | 0.71  | 0.88  | 0.98  | 8.70  | 10.70 | 11.93 |
| Fam3b         | 16 | 0.04 | 0.61  | 0.70  | 0.50  | 15.33 | 17.47 | 12.46 |
| Ly6k          | 15 | 0.20 | 3.22  | 2.55  | 2.76  | 16.30 | 12.90 | 13.93 |
| H2bfm         | X  | 0.03 | 0.60  | 0.64  | 0.38  | 23.20 | 24.55 | 14.47 |
| RP24-424K5.1  | 1  | 0.06 | 0.53  | 0.73  | 0.98  | 8.29  | 11.33 | 15.27 |
| 1700019B21Rik | X  | 0.77 | 13.18 | 11.18 | 13.61 | 17.06 | 14.46 | 17.61 |
| Svs5          | 2  | 0.04 | 0.32  | 0.52  | 0.75  | 7.46  | 12.27 | 17.69 |
| Trpa1         | 1  | 0.28 | 4.62  | 4.93  | 5.01  | 16.38 | 17.49 | 17.78 |
| Tpsab1        | 17 | 0.22 | 3.98  | 2.85  | 4.15  | 17.94 | 12.83 | 18.73 |
| Magea8        | X  | 0.05 | 0.50  | 0.67  | 1.00  | 9.94  | 13.53 | 20.10 |
| Ctcf1         | 2  | 0.07 | 2.44  | 2.05  | 2.01  | 35.94 | 30.21 | 29.54 |

**Supplemental Table 3. Genes commonly upregulated in mutants ( $\geq 2$ -fold,  $q < 0.05$  against wild type).**
